# Supplementary material for: 6 世界習俗研究班 「通過儀礼」比較研究(平成17〜18年度東西学術研究所研究報告書)
Source: Springer Nature journal article supplement (doi:10.1186/s12913-023-09422-7), 2007-04-01
Supplement: MOESM1 [file 25310004]

## Appendix

### Section 1: Demographic Characteristics

Please complete the following section regarding your demographic data

**1) What is your age (years)?**

18-34

35-44

45-54

55-64

65-70

**2) What is your gender?**

Male

Female

**3) What is your marital status?**

Married

Single

Divorced

Widowed

**4) Do you have children?**

Yes

No

**5) Do you smoke?**

No

Yes

<1 cigarette pack/day

1-2 cigarette packs/day

>2 cigarette packs/day

**6) Do you drink alcohol?**

No

Yes

Every day

3- 5 times/ week

Once a week

Only on weekends

On special occasions

## Section 2: Professional Status

### 7) What is your professional occupation?

Hospital pharmacist

Clinical pharmacist

Pharmacy Resident

### 8) Please select the term that best represents how you are employed in your current position

Full Time

Part Time

### 9) How many years of experience do you have as a licensed pharmacist?

\_\_\_\_\_

### 10) For how long have you been working in the same hospital?

\_\_\_\_\_

### 11) How many times have you changed your job?

\_\_\_\_\_

### 12) What is your highest pharmacy degree?

BS Pharmacy

PharmD

PGY-1

PGY-2

No postgraduate training

Other

**13) Which School of Pharmacy did you graduate from?**

---

**14) Are you BPS certified?**

Yes

No

**15) On average, how many hours do you work per week?**

< 20

20-40

41-60

> 60

**16) How many average weekends do you work per year?**

---

**17) How many hours weekly do you work from home?**

0

1-5

6-10

10-20

≥21

**18) How many average days do you work on call per month?**

---

**19) Are you eligible to receive overtime pay?**

Yes

No

**20) Have you ever observed or experienced any kind of discrimination at work? (sexual harassment, religious, gender...)?**

---

**21) Who is your social support?**

\_\_\_\_\_

**Section 3: Hospital Characteristics**

**22) What is your primary practice setting?**

- Teaching Hospital                       Nonteaching Hospital

**23) Please indicate which setting describes your practice**

- Private Hospital                       Public Hospital

**24) Where is the location of the hospital you practice in?**

- Beirut                                       Mount Lebanon

**25) What is the size of the institution you work in (number of beds)?**

- < 50  
 50-99  
 100-199  
 ≥ 200

**26) What is the mean daily patient workload (i.e. how many patients do you manage per day)?**

\_\_\_\_\_

**27) What is the mean number of medication orders verified?**

\_\_\_\_\_

**28) Does your current position involve participation in the following activities?**

|                                       | Yes | No |
|---------------------------------------|-----|----|
| Order Verification                    |     |    |
| Pharmacy Committee Participation      |     |    |
| Medical Staff Committee Participation |     |    |
| Resident Precepting                   |     |    |
| Student Precepting                    |     |    |
| Student Training                      |     |    |

|                                                                     |  |  |
|---------------------------------------------------------------------|--|--|
| Directing/Coordinating a residency program                          |  |  |
| Research / Publication                                              |  |  |
| Medication Reconciliation                                           |  |  |
| Formal Pharmacy Consultation (excluding nutrition)                  |  |  |
| Nutrition Support Consultation                                      |  |  |
| Didactic Lecturing                                                  |  |  |
| Procurement, Selection, and Purchasing of medications               |  |  |
| Medication Dispensing                                               |  |  |
| Sterile Compounding                                                 |  |  |
| Providing Adequate Information for safe medication use              |  |  |
| Strategies and Policies Implementation to Prevent Medication Errors |  |  |
| Leadership Role in Formulary Management and Update                  |  |  |
| Antibiotic Stewardship Involvement                                  |  |  |
| Pharmacokinetic Consults                                            |  |  |
| Pharmacotherapy Consults                                            |  |  |
| Documentation in Medical Records                                    |  |  |
| Pharmacy Patient Care Rounds                                        |  |  |
| Interdisciplinary Patient Care Rounds                               |  |  |
| Patient Counseling                                                  |  |  |

**Section 4: Professional Stressors**

29) To what extent have the following factors affected you in your practice over the last 12-24 months?

|                           | <b>Not at all</b> | <b>Small amount</b> | <b>Moderate amount</b> | <b>Large amount</b> | <b>Extreme amount</b> | <b>Not applicable</b> |
|---------------------------|-------------------|---------------------|------------------------|---------------------|-----------------------|-----------------------|
| Too many hours at work    |                   |                     |                        |                     |                       |                       |
| Too much downtime at work |                   |                     |                        |                     |                       |                       |

|                                        |  |  |  |  |  |  |
|----------------------------------------|--|--|--|--|--|--|
| Too much call                          |  |  |  |  |  |  |
| Inadequate research time               |  |  |  |  |  |  |
| Inadequate administrative time         |  |  |  |  |  |  |
| Inadequate teaching time               |  |  |  |  |  |  |
| Too many students                      |  |  |  |  |  |  |
| Too many residents                     |  |  |  |  |  |  |
| Low salary                             |  |  |  |  |  |  |
| Unpleasant work environment            |  |  |  |  |  |  |
| Inadequate office space                |  |  |  |  |  |  |
| Too little vacation                    |  |  |  |  |  |  |
| Medication-related errors              |  |  |  |  |  |  |
| Too many non-clinical responsibilities |  |  |  |  |  |  |

|                                              |  |  |  |  |  |  |
|----------------------------------------------|--|--|--|--|--|--|
| Difficult nonpharmacist<br>colleagues        |  |  |  |  |  |  |
| Difficult pharmacist<br>colleagues           |  |  |  |  |  |  |
| Contributions under-<br>appreciated          |  |  |  |  |  |  |
| Too much focus on<br>cost                    |  |  |  |  |  |  |
| Negative work/life<br>balance                |  |  |  |  |  |  |
| Little or no time for<br>professional growth |  |  |  |  |  |  |
| Work is not<br>intellectually<br>challenging |  |  |  |  |  |  |
| Spouse not<br>understanding of job<br>demand |  |  |  |  |  |  |
| Interruptions in work                        |  |  |  |  |  |  |
| Rushing                                      |  |  |  |  |  |  |
| Divided Attention                            |  |  |  |  |  |  |

**Section 5: Professional Satisfaction**

**30) In relation to your current position as a hospital pharmacist, how satisfied are you with the factors listed below?**

Please answer by:

5: Very satisfied

4: Somewhat satisfied

3: Neutral

2: Somewhat dissatisfied

1: Very dissatisfied

|                                                      | <b>1</b><br>Very<br>dissatisfied | <b>2</b><br>Somewhat<br>dissatisfied | <b>3</b><br>Neutral | <b>4</b><br>Somewhat<br>satisfied | <b>5</b><br>Very<br>satisfied |
|------------------------------------------------------|----------------------------------|--------------------------------------|---------------------|-----------------------------------|-------------------------------|
| Overall career                                       |                                  |                                      |                     |                                   |                               |
| Balance between<br>professional and<br>personal life |                                  |                                      |                     |                                   |                               |
| Time for professional<br>growth                      |                                  |                                      |                     |                                   |                               |
| Intellectual challenge of<br>work                    |                                  |                                      |                     |                                   |                               |
| My pharmacist<br>colleagues                          |                                  |                                      |                     |                                   |                               |
| My physician and<br>nursing colleagues               |                                  |                                      |                     |                                   |                               |
| My salary / income                                   |                                  |                                      |                     |                                   |                               |

**Section 6: MBI-HSS MP**



## Section 7: Coping Strategies

### 32) What strategies do you use to manage your work-related stress?

|                                                                                                                                                                                                                                       | Yes | No |
|---------------------------------------------------------------------------------------------------------------------------------------------------------------------------------------------------------------------------------------|-----|----|
| Medical consultation                                                                                                                                                                                                                  |     |    |
| Medication use <ul style="list-style-type: none"> <li>○ Medical prescription</li> <li>○ Self-medication</li> </ul>                                                                                                                    |     |    |
| Medication Type (if applicable) <ul style="list-style-type: none"> <li>○ Anxiolytic medication</li> <li>○ Hypnotic medication</li> <li>○ Phytotherapy medication</li> <li>○ Homeopathy medication</li> <li>○ Others: _____</li> </ul> |     |    |
| Leisure                                                                                                                                                                                                                               |     |    |
| Sport activities                                                                                                                                                                                                                      |     |    |
| Hobbies                                                                                                                                                                                                                               |     |    |
| Holidays or time off                                                                                                                                                                                                                  |     |    |
| Nutritional strategies                                                                                                                                                                                                                |     |    |
| Relaxation strategies                                                                                                                                                                                                                 |     |    |
| Psychotherapy                                                                                                                                                                                                                         |     |    |
